# Supplementary material
Source: PubMed Central journal article supplement (PMC4456658)
Supplement: supp_WNL.0000000000001642_Table_e-2.pdf [file supp_WNL.0000000000001642_Table_e-2.pdf]

**Supplementary Table e-2.** Demographic and clinical characteristic considering genders (A) and Riluzole treatment (B) in the London and Oxford cohorts separately and combined.

| A. Gender                               | London               |                        | Oxford               |                      | Combined             |                       |
|-----------------------------------------|----------------------|------------------------|----------------------|----------------------|----------------------|-----------------------|
|                                         | Male (n=67)          | Female (n=36)          | Male (n=45)          | Female (n=19)        | Male (n=112)         | Female (n=55)         |
| Blood NfL level <sup>^</sup><br>(pg/mL) | 82.3 (46.5, 150)     | 142.9 (76.1, 218.8)**  | 90 (53, 146)         | 90 (59, 183)         | 84.9 (50.8, 146.3)   | 125.7 (62, 214.7)*    |
| Age At Sampling <sup>^</sup><br>(years) | 63.6 (57.8, 68.3)    | 69.7 (59.3, 74.2)*     | 63 (53.5, 69)        | 57 (54, 67)          | 63.3 (55.2, 69)      | 67 (55.3, 73)         |
| Age At Onset <sup>^</sup><br>(years)    | 61.9 (44, 66.1)      | 67.7 (57.8, 73.8)**    | 60.8 (51.1, 67.7)    | 54.8 (51.2, 65.7)    | 61.7 (51.1, 66.5)    | 65.7 (53.2, 70.9)#    |
| PRB <sup>^</sup> (points/month)         | 0.449 (0.156, 0.853) | 0.684 (0.362, 1.471)** | 0.470 (0.232, 0.900) | 0.449 (0.275, 0.753) | 0.452 (0.181, 0.855) | 0.593 (0.313, 1.175)* |
| PRL <sup>^</sup> (points/month)         | 0.521 (0.202, 0.893) | 0.770 (0.407, 1.326)*  | 0.523 (0.226, 0.963) | 0.449 (0.272, 1.067) | 0.522 (0.210, 0.925) | 0.705 (0.354, 1.175)* |
| ALSFRS_R Score <sup>^</sup>             | 39 (33, 44)          | 33.5 (26.3, 37.8)***   | 35 (31, 39)          | 36 (32, 37)          | 38 (32, 42)          | 35 (28, 37)***        |
| Diagnosis [n (%)]                       |                      |                        |                      |                      |                      |                       |
| Definite ALS                            | 13 (19.4%)           | 6 (16.7%)              | 13 (28.9%)           | 7 (36.8%)            | 26 (23.2%)           | 13 (23.6%)            |
| Probable ALS                            | 26 (38.8%)           | 21 (58.3%)             | 14 (31.1%)           | 7 (36.8%)            | 40 (35.7%)           | 28 (50.9%)            |
| Possible ALS                            | 21 (31.3%)           | 6 (16.7%)              | 18 (40%)             | 5 (26.4%)            | 39 (34.8%)           | 11 (20%)              |
| Lab-Supported probable ALS              | 7 (10.5%)            | 3 (8.3%)               | 0                    | 0                    | 7 (6.3%)             | 3 (5.5%)              |
|                                         |                      |                        |                      |                      |                      |                       |
| B. Use of Riluzole                      | London               |                        | Oxford               |                      | Combined             |                       |

|                             | No (n=29; M/F: 21/8) | Yes (n=74; M/F: 46/28) | No (n=34; M/F: 24/10) | Yes (n=30; M/F: 21/9) | No (n=63; M/F: 45/18) | Yes (n=104; M/FL 67/37) |
|-----------------------------|----------------------|------------------------|-----------------------|-----------------------|-----------------------|-------------------------|
| Blood NfL level^<br>(pg/mL) | 66.8 (37.5, 139.2)   | 114 (58.7, 178.8)##    | 98.5 (50.3, 155.3)    | 88.5 (57.5, 135.5)    | 83 (42, 151)          | 99.9 (59, 158.6)        |
| Age At Sampling^<br>(years) | 64.4 (58.2, 69.9)    | 66.1 (58.7, 72.5)      | 66.5 (60.3, 70.8)     | 56 (51.5, 65.3)**     | 65.5 (58.6, 70)       | 63.8 (54, 69.8)         |
| Age At Onset^<br>(years)    | 62.2 (54, 67.6)      | 64.7 (56.5, 70.1)      | 63.6 (56.3, 68.9)     | 53.6 (50.0, 62.3)**   | 62.9 (54.4, 68.6)     | 61.8 (51.2, 67.9)       |
| PRB^ (points/month)         | 0.516 (0.127, 0.784) | 0.513 (0.246, 1.017)   | 0.402 (.0220, 0.838)  | 0.516 (0.321, 0.801)  | 0.410 (0.169, 0.785)  | 0.516 (0.267, 0.914)    |
| PRL^ (points/month)         | 0.521 (0.18, 0.913)  | 0.661 (0.331, 1.088)   | 0.387 (0.206, 0.839)  | 0.623 (0.343, 1.009)  | 0.449 (0.206, 0.888)  | 0.643 (0.338, 1.067)*   |
| ALSFRS_R Score^             | 39 (31.5, 43)        | 37 (27.8, 41.3)        | 36 (32, 39.3)         | 35 (31, 38)           | 37 (32, 41)           | 36 (30.1, 40)           |
| Diagnosis [n (%)]           |                      |                        |                       |                       |                       |                         |
| Definite ALS                | 3 (10.3%)            | 16 (21.6%)             | 9 (26.5%)             | 11 (36.7%)            | 12 (19%)              | 27 (26.0%)              |
| Probable ALS                | 10 (34.5%)           | 37 (50%)               | 9 (26.5%)             | 12 (40%)              | 19 (30.2%)            | 49 (47.0%)              |
| Possible ALS                | 12 (41.4%)           | 15 (20.3%)             | 16 (47%)              | 7 (23.3%)             | 28 (44.5%)            | 22 (21.2%)              |
| Lab-Supported probable ALS  | 4 (13.8%)            | 6 (8.1%)               | 0                     | 0                     | 4 (6.3%)              | 6 (5.8%)                |

^: Median (IQR)

Comparison was made between the gender and within each cohort; Mann-Whitney U test or unpaired *t*-test was used where suitable.

\*:  $p < 0.05$ ; \*\*:  $p < 0.01$ ; \*\*\*:  $p < 0.001$ ; #:  $p = 0.054$ ; ##:  $p = 0.057$
