# Supplementary material
Source: PubMed Central journal article supplement (PMC4456658)
Supplement: supp_WNL.0000000000001642_Table_e-3.pdf [file supp_WNL.0000000000001642_Table_e-3.pdf]

**Supplementary Table e-3.** Summary of the multi-level analysis of the longitudinal NfL patterns.

| Cohort/Sample type | Outcome                                                                       | Exposure Groups       | Estimate (95% CI) <sup>#</sup> | P-value for difference compared with ALS-Slow | Exposure Groups    | Estimate (95% CI) <sup>#</sup> | P-value for difference compared with ALS-BM |      |
|--------------------|-------------------------------------------------------------------------------|-----------------------|--------------------------------|-----------------------------------------------|--------------------|--------------------------------|---------------------------------------------|------|
|                    |                                                                               | A <sup>§</sup> (n)    |                                |                                               | B <sup>§</sup> (n) |                                |                                             |      |
| London/Plasma      | NfL levels at baseline* (pg/mL)                                               | ALS-Slow (30)         | 79.1 (59.6, 104.8)             | -                                             | ALS-BM (33)        | 73.8 (56.6, 96.3)              | -                                           |      |
|                    |                                                                               | ALS-Intermediate (22) | 99.0 (71.4, 137.2)             | 0.29                                          |                    | ALS-AM (34)                    | 118.2 (91.0, 153.7)                         | 0.01 |
|                    |                                                                               | ALS-Fast (15)         | 122.0 (82.5, 180.3)            | 0.07                                          |                    |                                |                                             |      |
|                    | Change in NfL levels during the first 15 months of F/U** (% change per month) | ALS-Slow (30)         | 0.3 (-1.0, 1.6)<br>P†=0.68     | -                                             | ALS-BM (33)        | 0.5 (-0.8, 1.8)<br>P=0.46†     | -                                           |      |
|                    |                                                                               | ALS-Intermediate (22) | 1.3 (-0.4, 3.0) P†=0.13        | 0.35                                          | ALS-AM (34)        | 0.6 (-0.8, 2.1)                | 0.89                                        |      |
|                    |                                                                               | ALS-Fast (15)         | -0.1 (-2.4, 2.2)<br>P†=0.91    | 0.76                                          |                    | P=0.41†                        |                                             |      |
| Oxford/Serum       | NfL levels at baseline* (pg/mL)                                               | ALS-Slow (21)         | 55.8 (41.1, 75.7)              | -                                             | ALS-BM (21)        | 56.6 (41.3, 77.6)              | -                                           |      |
|                    |                                                                               | ALS-Intermediate (12) | 92.7 (62.1, 138.4)             | 0.05                                          | ALS-AM (22)        | 107.2 (78.8, 146.0)            | 0.004                                       |      |
|                    |                                                                               | ALS-Fast (10)         | 125 (80.5, 194.2)              | 0.003                                         |                    |                                |                                             |      |

|                   |                                                                                       |                       |                             |        |             |                             |        |
|-------------------|---------------------------------------------------------------------------------------|-----------------------|-----------------------------|--------|-------------|-----------------------------|--------|
|                   |                                                                                       |                       |                             |        |             |                             |        |
|                   | <b>Change in NfL0 levels during the first 15 months of F/U** (% change per month)</b> | ALS-Slow (21)         | -0.1 (-1.2, 1.1)<br>P†=0.93 | -      | ALS-BM (21) | -0.1 (-1.3, 1.2)<br>P=0.93† | -      |
|                   |                                                                                       | ALS-Intermediate (12) | -0.7 (-2.3, 0.9) P†=0.39    | 0.51   |             |                             |        |
|                   |                                                                                       | ALS-Fast (10)         | 4.6 (1.6, 7.7) P†=0.003     | 0.005  | ALS-AM (22) | 0.5 (-1.0, 2.0)<br>P=0.54†  | 0.59   |
| <b>Oxford/CSF</b> | <b>NfL levels at baseline* (pg/mL)</b>                                                | ALS-Slow (9)          | 2882 (2014, 4125)           | -      | ALS-BM (11) | 2993 (2038, 4395)           | -      |
|                   |                                                                                       | ALS-Intermediate (8)  | 6294 (4326, 9156)           | 0.003  |             |                             |        |
|                   |                                                                                       | ALS-Fast (7)          | 10917 (7164, 16634)         | <0.001 | ALS-AM (11) | 8024 (5936, 10846)          | <0.001 |
|                   | <b>Change in NfL levels during the first 15 months of F/U** (% change per month)</b>  | ALS-Slow (9)          | 1.3 (0.4, 2.1) P†=0.003     | -      | ALS-BM (11) | 1.3 (0.3, 2.2)<br>P=0.007†  | -      |
|                   |                                                                                       | ALS-Intermediate (8)  | -0.3 (-1.1, 0.4) P†=0.39    | 0.005  |             |                             |        |
|                   |                                                                                       | ALS-Fast (7)          | 3.3 (0.8, 5.9) P†=0.01      | 0.14   | ALS-AM (11) | -0.1 (-0.9, 0.8)<br>P=0.89† | 0.04   |

<sup>§</sup>Exposure groups: categorised by progression rate at the last visit (PRL)

A: PRL<0.5 point/month: ALS-Slow, PRL 0.5-1.0 point/month: ALS-Intermediate, PRL >1.0 point/month: ALS-Fast

B: PRL with median cut-off. AM: above median; BM: below median.

Median PRL in London cohort: 0.54

Median PRL in Oxford cohort: 0.52

#CI: Confidential Interval

\*The estimate presented is the geometric mean NfL level at baseline in each exposure group

The estimate presented is the percentage change in NfL per month in each exposure group

†P-value for the rate of change in NfL over time being different from 0 in the exposure group
